# Supplementary material
Source: publisher figshare collection journal article supplement (https://acs.figshare.com/ndownloader/files/20039930)
Supplement: Supplementary file 1 [file 20039930]

**Supporting Information**

**Thermoelectric and mechanical properties of  
environmentally friendly  $\text{Mg}_2\text{Si}_{0.3}\text{Sn}_{0.67}\text{Bi}_{0.03}/\text{SiC}$   
composites**

*Leilane R. Macario<sup>†</sup>, Yixuan Shi<sup>†</sup>, Parisa Jafarzadeh<sup>†</sup>, Tianze Zou<sup>††</sup>, Jan B. Kycia<sup>††</sup>, Holger  
Kleinke<sup>\*†</sup>*

<sup>†</sup> Department of Chemistry and Waterloo Institute for Nanotechnology, University of Waterloo,  
Waterloo, ON N2L 3G1, Canada

<sup>††</sup> Department of Physics and Astronomy and Guelph-Waterloo Physics Institute, University of  
Waterloo, Waterloo, ON, Canada N2L 3G1

\*Email: [kleinke@uwaterloo.ca](mailto:kleinke@uwaterloo.ca)

**Table S1.** Area scan results (percentages) of the  $\text{Mg}_2\text{Si}_{0.30}\text{Sn}_{0.67}\text{Bi}_{0.03}$  sample.

| Area                      | Mg   | Si   | Sn   | Bi  |
|---------------------------|------|------|------|-----|
| 1                         | 66.1 | 10.5 | 22.4 | 1.0 |
| 2                         | 66.6 | 10.3 | 22.2 | 0.9 |
| 3                         | 66.4 | 10.1 | 22.8 | 0.7 |
| Average                   | 66.3 | 10.3 | 22.5 | 0.9 |
| Nominal composition wt.-% | 66.7 | 10.0 | 22.3 | 1.0 |

**Table S2.** Densities and specific heat of  $\text{Mg}_2\text{Si}_{0.30}\text{Sn}_{0.67}\text{Bi}_{0.03}$  / SiC composites.

| Sample                                                                       | Density Archimedes    | Theoretical density | Cp    |
|------------------------------------------------------------------------------|-----------------------|---------------------|-------|
|                                                                              | (g.cm <sup>-1</sup> ) | (%)                 |       |
| $\text{Mg}_2\text{Si}_{0.30}\text{Sn}_{0.67}\text{Bi}_{0.03}$                | 3.19                  | 99                  | 0.524 |
| $\text{Mg}_2\text{Si}_{0.30}\text{Sn}_{0.67}\text{Bi}_{0.03}$ + 0.5 wt-% SiC | 3.18                  | 98                  | 0.527 |
| $\text{Mg}_2\text{Si}_{0.30}\text{Sn}_{0.67}\text{Bi}_{0.03}$ + 1.0 wt-% SiC | 3.19                  | 99                  | 0.531 |
| $\text{Mg}_2\text{Si}_{0.30}\text{Sn}_{0.67}\text{Bi}_{0.03}$ + 1.5 wt-% SiC | 3.18                  | 98                  | 0.535 |
| $\text{Mg}_2\text{Si}_{0.30}\text{Sn}_{0.67}\text{Bi}_{0.03}$ + 3.0 wt-% SiC | 3.18                  | 98                  | 0.545 |

**Equation S1.** Hashin model<sup>1</sup>.

$$E_c = E_m \left( \frac{E_m V_m + E_r \{V_r + 1\}}{E_r V_m + E_m \{V_r + 1\}} \right),$$

where,  $E_c$  is Young's modulus of the composite,  $E_m$  is Young's modulus of the matrix,  $E_r$  is Young's modulus of the reinforcing phase ( $E_r$  equals to 440 GPa)<sup>2</sup>,  $V_m$  is volume fraction of the matrix, and  $V_r$  is volume fraction of the reinforcing phase (here: SiC).

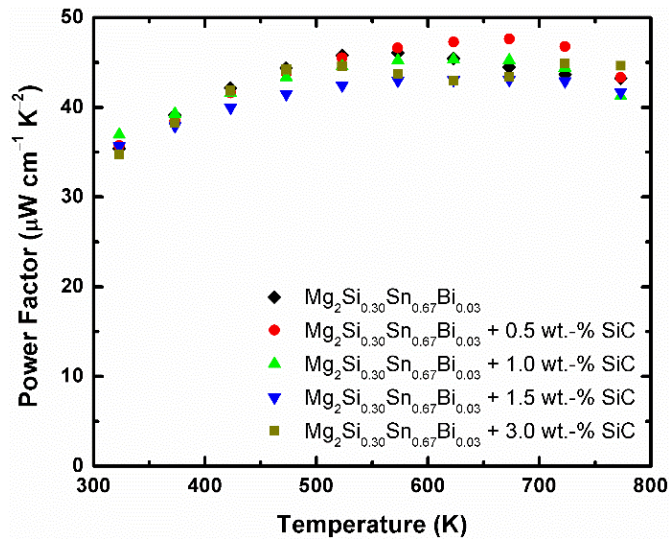

**Figure S1.** Power factor of  $\text{Mg}_2\text{Si}_{0.30}\text{Sn}_{0.67}\text{Bi}_{0.03}$  composites with 0, 0.5, 1.0, 1.5, and 3.0 wt.-% of SiC.

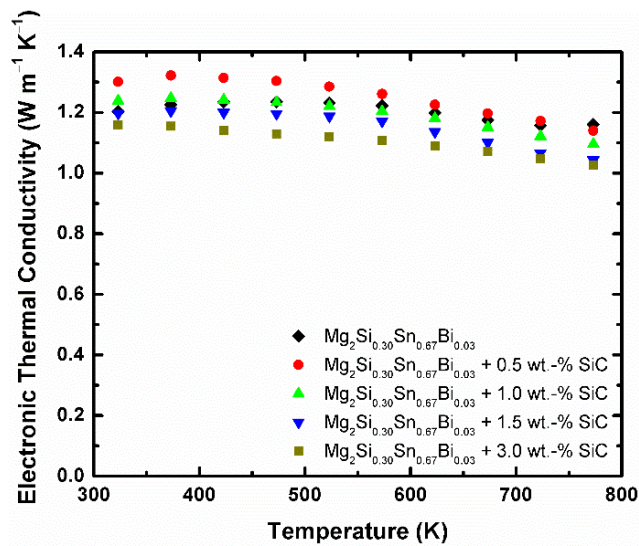

**Figure S2.** Calculated electronic thermal conductivity of  $\text{Mg}_2\text{Si}_{0.30}\text{Sn}_{0.67}\text{Bi}_{0.03}$  composites with 0, 0.5, 1.0, 1.5, and 3.0 wt.-% of SiC.

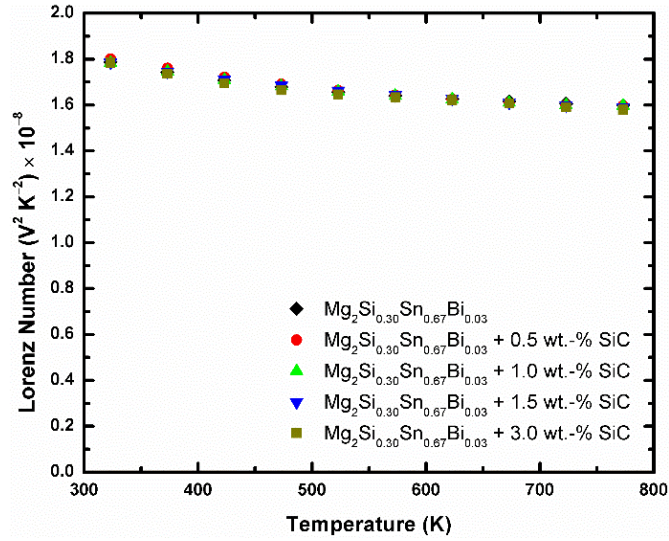

**Figure S3.** Calculated Lorenz numbers between 300 K and 800 K of  $\text{Mg}_2\text{Si}_{0.30}\text{Sn}_{0.67}\text{Bi}_{0.03}$  composites with 0, 0.5, 1.0, 1.5, and 3.0 wt.-% of SiC.

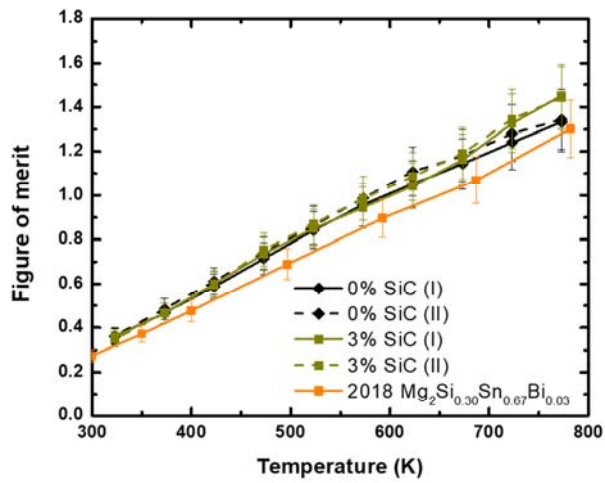

**Figure S4.** Figure of merit values from the two different pellets of  $\text{Mg}_2\text{Si}_{0.30}\text{Sn}_{0.67}\text{Bi}_{0.03}$  (black symbols);  $\text{Mg}_2\text{Si}_{0.30}\text{Sn}_{0.67}\text{Bi}_{0.03}/3.0$  wt.-% SiC composite (mustard symbols), compared to the 2018 data on  $\text{Mg}_2\text{Si}_{0.30}\text{Sn}_{0.67}\text{Bi}_{0.03}$  (orange symbol).

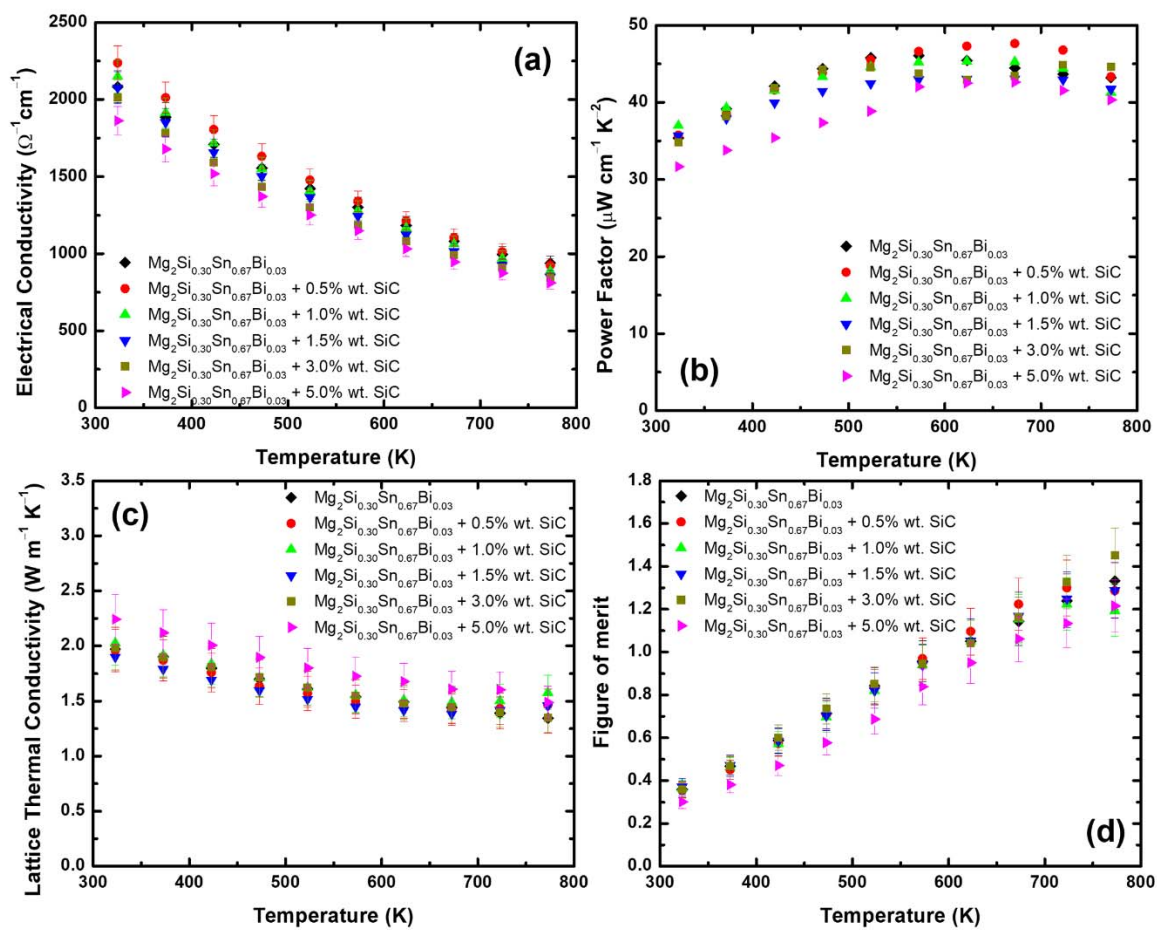

**Figure S5.** Electrical conductivity, power factor, lattice thermal diffusivity, and figure of merit of  $\text{Mg}_2\text{Si}_{0.30}\text{Sn}_{0.67}\text{Bi}_{0.03}$  composites with 0, 0.5, 1.0, 1.5, 3.0, and 5.0 wt.-% of SiC.

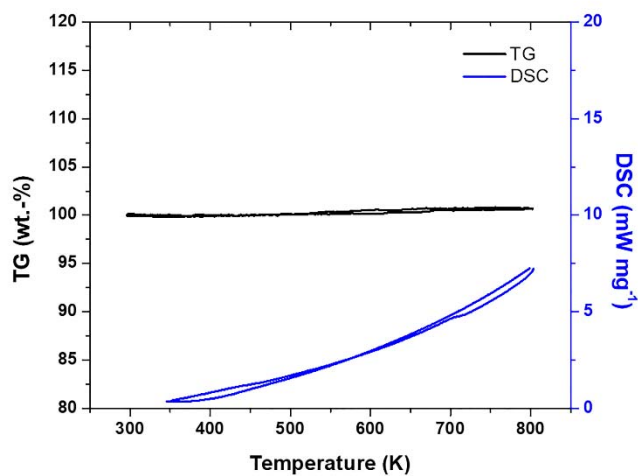

**Figure S6.** TG and DSC of  $\text{Mg}_2\text{Si}_{0.3}\text{Sn}_{0.67}\text{Bi}_{0.03}$ .

#### REFERENCES

- (1) Hashin, Z. The Elastic Moduli of Heterogeneous Materials. *J. Appl. Mech.* **1962**, 29 (1), 143–150.
- (2) Schreiber, E.; Soga, N. Elastic Constants of Silicon Carbide. *J. Am. Ceram. Soc.* **1966**, 49 (6), 342–342.
